# Supplementary material
Source: HighWire-hosted journal article supplement (https://bmjopen.bmj.com/content/7/11/e018128)
Supplement: inline-supplementary-material-3 [file inline-supplementary-material-3.pdf]

### Appendix 3. Probability distributions, outcome scores and weighted scores

We assessed safety through aggregating outcome scores by their respective probabilities. Table A lists the outcome scores and probability calculation; Table B shows sensitivity and specificity of the pH test under cut-offs 1-9. The weighted scores are thus the sum product of Column 2 and Column 3 of Table A.

Table C and Table D show respectively the probability distributions and outcome score contributions under cut-offs 1-9.

**Table A ( Table 1 main text). Probability and safety of decision outcomes of the**

| <b>pH test</b>                                                     |                                                                          |       |
|--------------------------------------------------------------------|--------------------------------------------------------------------------|-------|
| Outcome                                                            | Probability                                                              | Score |
| Feeding into the stomach by pH                                     | Prior probability of stomach x<br>Sensitivity of pH                      | 100   |
| Feeding into the lung by pH<br>(feeding error)                     | Prior probability of lung x<br>(1- Specificity in lung)                  | 0     |
| Feeding into the oesophagus by pH<br>(feeding error )              | Prior probability of oesophageal x<br>(1- Specificity in oesophagus)     | 45    |
| Delayed feeding into the stomach<br>by x-rays (unnecessary x-rays) | Prior probability of stomach x<br>(1-Sensitivity of pH)                  | 85    |
| No feeding outside the stomach by<br>pH or by x-rays               | Prior probability of lung/oesophagus x<br>Specificity in lung/oesophagus | 100   |

**Table B (Table 2 main text). Accuracy of pH test under cut-offs 1-9**

| pH cut-offs | Sensitivity<br>(stomach) | Specificity<br>(Lung) | Specificity<br>(oesophagus) |
|-------------|--------------------------|-----------------------|-----------------------------|
| 1           | 0.015                    | 1                     | 1                           |
| 2           | 0.257                    | 1                     | 1                           |
| 3           | 0.39                     | 1                     | 1                           |
| 4           | 0.544                    | 1                     | 0.985                       |
| 5           | 0.68                     | 1                     | 0.948                       |
| 5.5         | 0.743                    | 1                     | 0.81                        |
| 6           | 0.81                     | 0.996                 | 0.792                       |
| 7           | 0.914                    | 0.91                  | 0.492                       |
| 8           | 0.991                    | 0.337                 | 0.225                       |
| 9           | 1                        | 0.004                 | 0.068                       |

**Table C. Probability distributions across pH cut-offs (data for Fig 2)**

| Cut-offs | stomach_feed | lung_feed | oes_feed | delayed | Nofeed |
|----------|--------------|-----------|----------|---------|--------|
| 1        | 1.1%         | 0.0%      | 0.0%     | 69.0%   | 30.0%  |
| 2        | 18.0%        | 0.0%      | 0.0%     | 52.0%   | 30.0%  |
| 3        | 27.3%        | 0.0%      | 0.0%     | 42.7%   | 30.0%  |
| 4        | 38.1%        | 0.0%      | 0.2%     | 31.9%   | 29.8%  |
| 5        | 47.6%        | 0.0%      | 0.8%     | 22.4%   | 29.2%  |
| 5.5      | 52.0%        | 0.0%      | 2.9%     | 18.0%   | 27.2%  |
| 6        | 56.7%        | 0.1%      | 3.1%     | 13.3%   | 26.8%  |
| 7        | 64.0%        | 1.4%      | 7.6%     | 6.0%    | 21.0%  |
| 8        | 69.4%        | 9.9%      | 11.6%    | 0.6%    | 8.4%   |
| 9        | 70.0%        | 14.9%     | 14.0%    | 0.0%    | 1.1%   |

**Table D. Weighted scores with part-contributions from individual outcomes**  
**(data for Figure 3)**

| Cut-offs   | stomach_feed | lung_feed | oes_feed | delayed | nofeed | Total |
|------------|--------------|-----------|----------|---------|--------|-------|
| 1          | 1.1          | 0.0       | 0.0      | 58.6    | 30.0   | 89.7  |
| 2          | 18.0         | 0.0       | 0.0      | 44.2    | 30.0   | 92.2  |
| 3          | 27.3         | 0.0       | 0.0      | 36.3    | 30.0   | 93.6  |
| 4          | 38.1         | 0.0       | 0.1      | 27.1    | 29.8   | 95.1  |
| <b>5</b>   | 47.6         | 0.0       | 0.4      | 19.0    | 29.2   | 96.2  |
| <b>5.5</b> | 52.0         | 0.0       | 1.3      | 15.3    | 27.2   | 95.7  |
| 6          | 56.7         | 0.0       | 1.4      | 11.3    | 26.8   | 96.2  |
| 7          | 64.0         | 0.0       | 3.4      | 5.1     | 21.0   | 93.6  |
| 8          | 69.4         | 0.0       | 5.2      | 0.5     | 8.4    | 83.6  |
| 9          | 70.0         | 0.0       | 6.3      | 0.0     | 1.1    | 77.4  |
